# Supplementary material for: Uptake routes of microplastics in fishes: practical and theoretical approaches to test existing theories
Source: PubMed Central journal article supplement (PMC7054251; doi:10.1038/s41598-020-60630-1), 2020-03-03
Supplement: 41598_2020_60630_MOESM1_ESM.pdf [file 41598_2020_60630_MOESM1_ESM.pdf]

# Uptake routes of microplastics in fishes: practical and theoretical approaches to test existing theories

S. Roch<sup>1,2\*</sup>, C. Friedrich<sup>3</sup>, A. Brinker<sup>1,2</sup>

<sup>1</sup> Fisheries Research Station Baden-Württemberg, Argenweg 50/1, 88085 Langenargen, Germany. <sup>2</sup> University of Konstanz, Mainaustraße 252, 78464 Konstanz, Germany. <sup>3</sup> FMF Freiburg Material Research Centre and Institute for Macromolecular Chemistry, University of Freiburg, Stefan-Meier-Straße 21, 79104 Freiburg i. Br., Germany

\*Correspondance and requests for materials should be addressed to S. R. (email: samuel.roch@lazbw.bwl.de)

## Supplementary information

| Variable       | Habitat               | fish size   | Value                                           | Reference                                  |
|----------------|-----------------------|-------------|-------------------------------------------------|--------------------------------------------|
| Drinking rate  | freshwater            | 20-30 g     | 0.15 ± 0.03 ml kg <sup>-1</sup> h <sup>-1</sup> | Fuentes & Eddy 1997 <sup>1</sup>           |
|                |                       | 20-30 g     | 0.25 ml kg <sup>-1</sup> h <sup>-1</sup>        | Fuentes <i>et al.</i> 1996 <sup>2</sup>    |
|                |                       | 50 g        | 1.43 ± 0.31 ml kg <sup>-1</sup> h <sup>-1</sup> | Lovegrove & Eddy 1982 <sup>3</sup>         |
|                |                       | 150 - 250 g | 0 ml kg <sup>-1</sup> h <sup>-1</sup>           | Shehadeh & Gordon 1969 <sup>4</sup>        |
|                |                       | n.a.        | 0.03 ± 0.01 ml kg <sup>-1</sup> h <sup>-1</sup> | Perrot <i>et al.</i> 1992 <sup>5</sup>     |
|                |                       | <b>mean</b> | <b>0.4 ml kg<sup>-1</sup> h<sup>-1</sup></b>    |                                            |
|                | marine                | 20-30 g     | 3.89 ± 0.28 ml kg <sup>-1</sup> h <sup>-1</sup> | Fuentes & Eddy 1997 <sup>1</sup>           |
|                |                       | 20-30 g     | 2.4 ml kg <sup>-1</sup> h <sup>-1</sup>         | Fuentes <i>et al.</i> 1996 <sup>2</sup>    |
|                |                       | 50 g        | 7.40 ± 1.63 ml kg <sup>-1</sup> h <sup>-1</sup> | Lovegrove & Eddy 1982 <sup>3</sup>         |
|                |                       | 150 - 250 g | 5.4 ± 0.5 ml kg <sup>-1</sup> h <sup>-1</sup>   | Shehadeh & Gordon 1969 <sup>4</sup>        |
|                |                       | n.a.        | 1.42 ± 0.23 ml kg <sup>-1</sup> h <sup>-1</sup> | Perrot <i>et al.</i> 1992 <sup>5</sup>     |
|                |                       | <b>mean</b> | <b>4.1 ml kg<sup>-1</sup> h<sup>-1</sup></b>    |                                            |
| Residence time | freshwater,<br>marine | -           | 51 h                                            | Roch <i>et al.</i> (in preparation)        |
|                |                       | -           | 33 h                                            | Grigorakis <i>et al.</i> 2017 <sup>6</sup> |
|                |                       | -           | 48 h                                            | Lu <i>et al.</i> 2016 <sup>7</sup>         |
|                |                       | <b>mean</b> | <b>44 h</b>                                     |                                            |

**Table S1.** Drinking rates of marine and freshwater fish and residence time of microplastics in the gastrointestinal tract for the model approaches to calculate the passive uptake of microplastics via drinking.

| Model                                     | Dependent variable | Fish species                                       | Sampling points | Model effects                                                                                                                                      |
|-------------------------------------------|--------------------|----------------------------------------------------|-----------------|----------------------------------------------------------------------------------------------------------------------------------------------------|
| Nominal-logistic regression model         | prevalence         | rainbow trout, grayling, common carp, crucian carp | 0 h             | origin, foraging style, feeding status, particle concentration, total length, foraging style x feeding                                             |
| Generalized linear model <sup>a</sup>     | abundance          | rainbow trout, grayling, common carp, crucian carp | 0 h             | origin, foraging style, feeding status, particle concentration, total length                                                                       |
|                                           | abundance          | rainbow trout, grayling, common carp, crucian carp | 0 h, 6 h, 24 h  | sampling time, fish species, feeding status, particle concentration                                                                                |
|                                           | intensity          | rainbow trout, grayling, common carp, crucian carp | 0 h, 6 h, 24 h  | feeding status, particle concentration, particle appearance, particle density                                                                      |
| Generalized regression model <sup>b</sup> | intensity          | rainbow trout, grayling                            | 0 h, 6 h, 24 h  | particle concentration, origin, feeding status, particle appearance, particle appearance x particle concentration, origin x particle concentration |

**Table S2.** Model specifications for each performed model to examine the microplastic uptake of fish in the exposure experiments. <sup>a</sup>A Poisson distribution with a logarithmic link function was assumed for each GLM. Furthermore, an overdispersion parameter was included in each model to adjust variance independent of the mean<sup>8</sup>. <sup>b</sup>A negative binomial distribution was assumed and the model was fitted with help of an elastic net and AIC as the model evaluation method<sup>9</sup>.

| Fish species  | Total length [cm] |     | Fresh weight [g] |     |
|---------------|-------------------|-----|------------------|-----|
|               | mean              | SD  | mean             | SD  |
| rainbow trout | 11.3              | 0.8 | 17.0             | 3.8 |
| grayling      | 11.8              | 1.0 | 9.1              | 2.3 |
| common carp   | 8.0               | 0.7 | 7.3              | 2.9 |
| crucian carp  | 7.0               | 0.5 | 5.3              | 1.4 |

**Table S3.** Summary of the total length and fresh weight of experimental fish used in the exposure experiments. SD = Standard deviation.

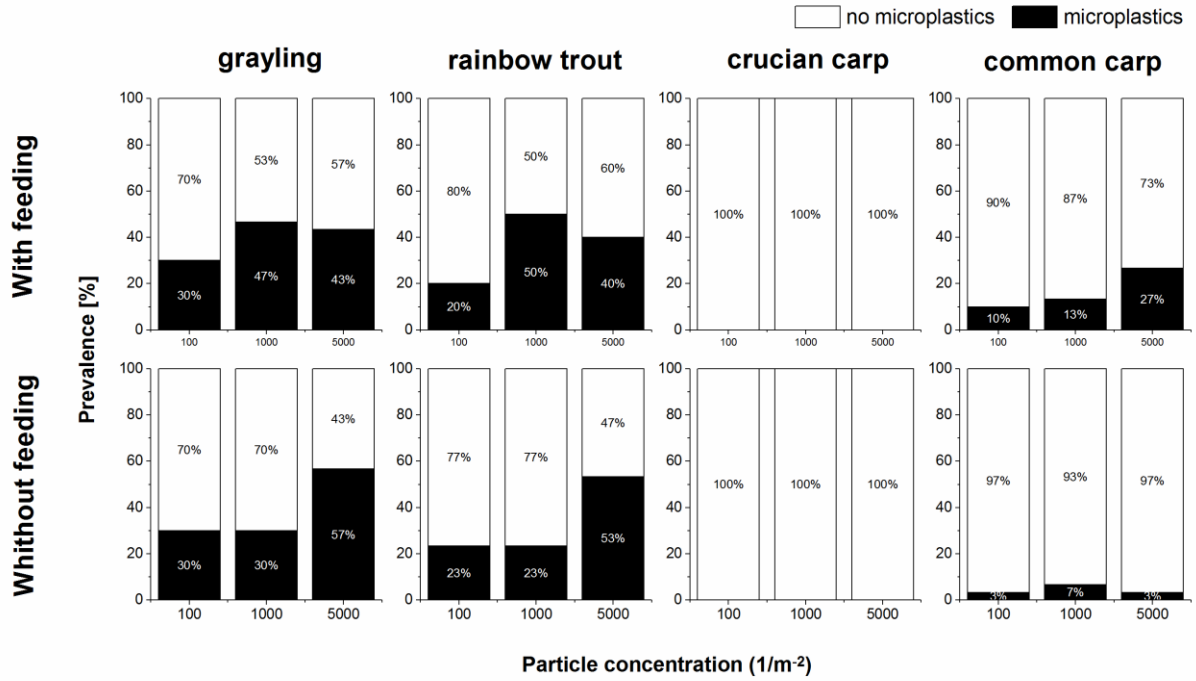

**Figure S1.** Mean microplastic prevalence for each fish species, particle concentration and feeding status, directly after exposure.

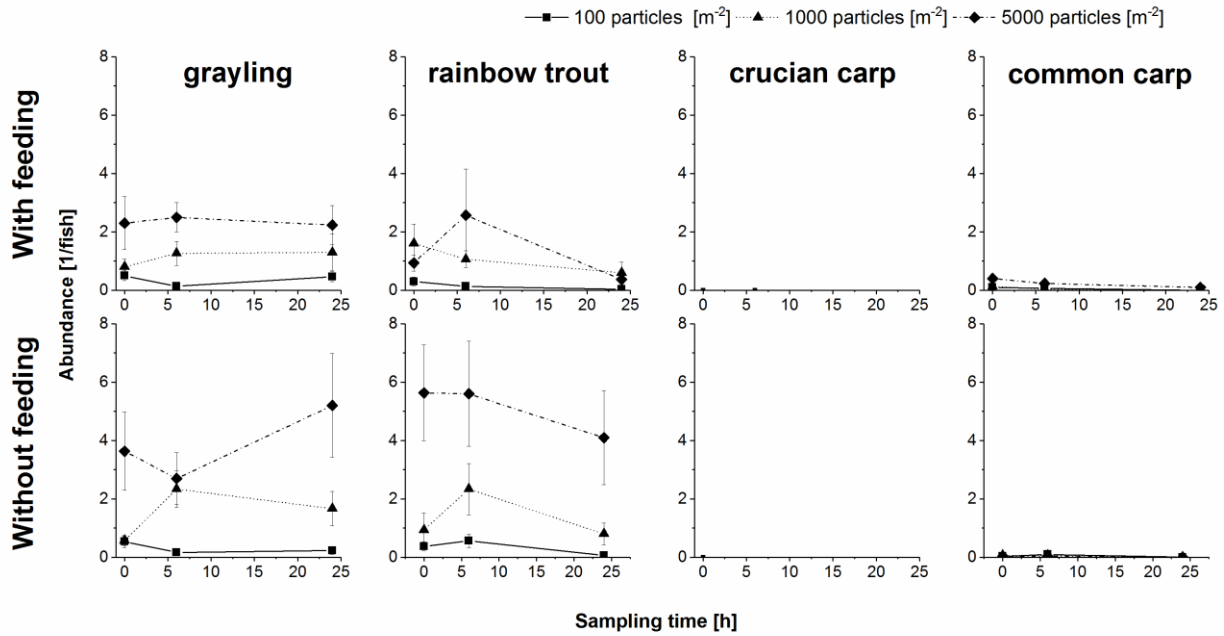

**Figure S2.** Mean microplastic abundance [ $\pm$  standard error] for each fish species, particle concentration, sampling point and feeding status.

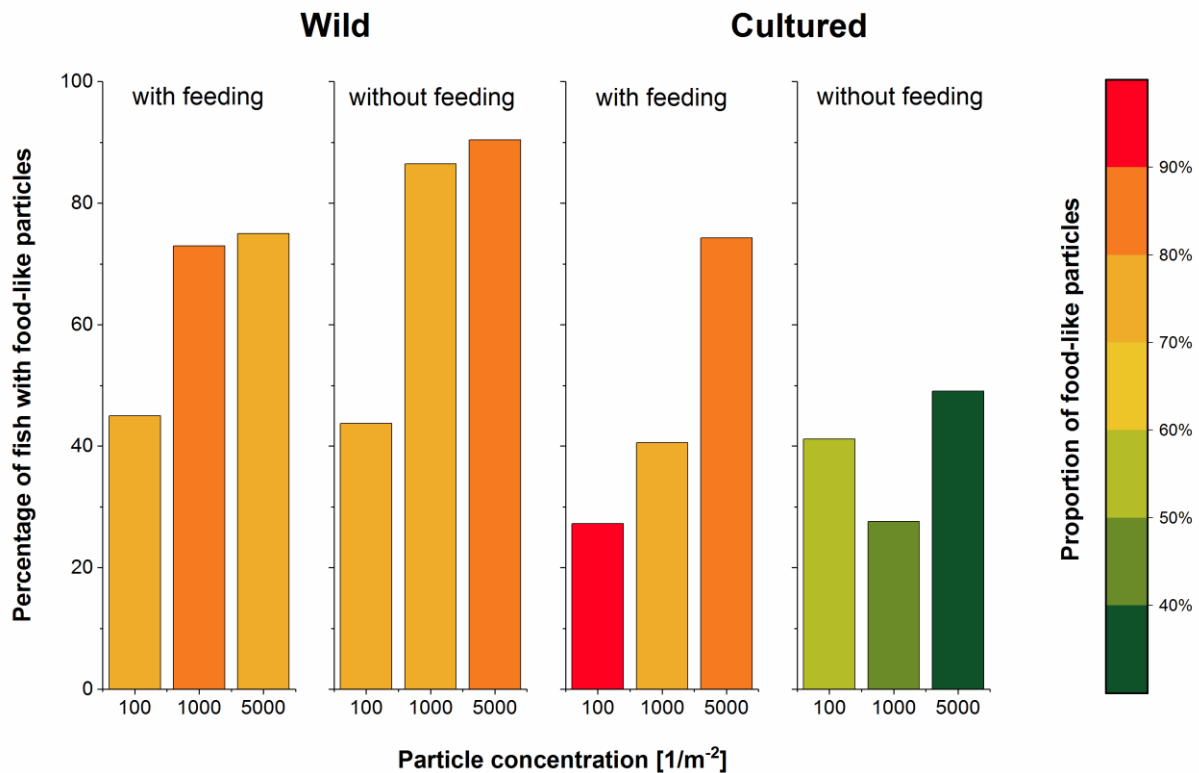

**Figure S3.** Percentage of fishes with microplastics that ingested at least one food-like particle (all time points). Colours indicate the proportion of food-like particles, compared to all particles ingested.

## References

1. Fuentes, J. & Eddy, F. B. Drinking in marine, euryhaline and freshwater teleost fish. in *Ionic Regulation in Animals: A Tribute to Professor W.T.W.Potts* (eds. Hazon, N., Eddy, F. B. & Flik, G.) 135–149 (Springer Berlin Heidelberg, 1997). doi:10.1007/978-3-642-60415-7\_9.
2. Fuentes, J., Bury, N. R., Carroll, S. & Eddy, F. B. Drinking in Atlantic salmon psmolts ( *Salmo salar* L.) and juvenile rainbow trout ( *Oncorhynchus mykiss* Walbaum) in response to cortisol and sea water challenge. *Aquaculture* **141**, 129–137 (1996).
3. Lovegrove, S. M. & Eddy, B. Uptake and accumulation of zinc in juvenile rainbow trout, *Salmo gairdneri*. *Environ. Biol. Fishes* **7**, 285–289 (1982).
4. Shehadeh, Z. H. & Gordon, M. S. The role of the intestine in salinity adaptation of the rainbow trout, *Salmo gairdneri*. *Comp. Biochem. Physiol.* **30**, 397–418 (1969).

5. Perrott, M. N., Grierson, C. E., Hazon, N. & Balment, R. J. Drinking behaviour in sea water and fresh water teleosts, the role of the renin-angiotensin system. *Fish Physiol. Biochem.* **10**, 161–168 (1992).
6. Grigorakis, S., Mason, S. A. & Drouillard, K. G. Determination of the gut retention of plastic microbeads and microfibers in goldfish (*Carassius auratus*). *Chemosphere* **169**, 233–238 (2017).
7. Lu, Y. *et al.* Uptake and Accumulation of Polystyrene Microplastics in Zebrafish ( *Danio rerio* ) and Toxic Effects in Liver. *Environ. Sci. Technol.* **50**, 4054–4060 (2016).
8. McCullagh, P. & Nelder, J. A. *Generalized Linear Models*. (Chapman and Hall, 1983).
9. Sokal, R. R. & Rohlf, J. F. *Biometry: The Principles and Practice of Statistics in Biological Research*. (W.H. Freeman and Company, 2003).
